# Supplementary material
Source: PubMed Central journal article supplement (PMC3669784)
Supplement: 97320630009334S1.pdf [file 97320630009334S1.pdf]

## Supplementary material:

**Table 1:** Amino acid sequence and MolDock scores were presented in Table. From table, it is clear that Ligand with pose Unknown 1 is said to be best fit into Cytochrome p450 3A4 leading to least MolDock score and re-rank scores.

| S. NO | Ligand                  | Cavity Volume                 | Amino Acid Sequence Surrounding the Cavity                                                                              | MolDock score | Rerank score | RMSD    | HBond        |
|-------|-------------------------|-------------------------------|-------------------------------------------------------------------------------------------------------------------------|---------------|--------------|---------|--------------|
| 1     | Piperine-Fe conjugate 1 | 605.696<br>Proximity (A)-2.61 | A <sup>3</sup> ; (A)-<br>Ala(305,370) Phe(57,108,137,215,302,435);<br>Arg (105,372) Thr (309); Ile (443, 301) Ser (119) | -132.788      | -108.422     | 91.4833 | -<br>7.41695 |
| 2     | Piperine-Fe conjugate 2 | 59.904<br>Proximity(A)-2.61   | A <sup>3</sup> ; Arg (162)                                                                                              | -127.055      | -83.8605     | 91.487  | -9.8363      |
| 3     | Piperine-Fe conjugate 3 | 32.768<br>Proximity(A)-2.61   | A <sup>3</sup> ; Phe (419)                                                                                              | -123.969      | -90.9825     | 89.9825 | -2.5         |
| 4     | Piperine-Fe conjugate 4 | 31.744<br>Proximity(A)-2.61   | A <sup>3</sup> ; Leu (133), Glu (294)                                                                                   | -117.297      | -80.996      | 90.1965 | -2.5         |
| 5     | Piperine-Fe conjugate 5 | 27.648<br>Proximity(A)-2.65   | A <sup>3</sup> ; Leu (351.499),Lys (453), Met (450)                                                                     | 119.177       | -98.6817     | 90.0128 | 0            |
